# Supplementary material
Source: PubMed Central journal article supplement (PMC6068787)
Supplement: Supplementary_Table_1.pdf [file Supplementary_Table_1.pdf]

**Supplementary Table 1:** Comparing the demographic and clinical details of patients who died within 30 days of CDI diagnosis to those who survived

| Characteristic                                                  | Total Study Cohort |                   |         |
|-----------------------------------------------------------------|--------------------|-------------------|---------|
|                                                                 | Alive              | Dead              | P value |
| <b>Total patients in group</b>                                  | 60                 | 13                |         |
| <b>Sex</b>                                                      |                    |                   |         |
| Female - no. (%)                                                | 36 (60)            | 8 (61)            | 1       |
| <b>Age (years) - mean ± SD</b>                                  | 69 ± 18.7          | 67 ± 13           | 0.7     |
| <b>Charlson score - median (IQR)</b>                            | 5 (3-7)            | 7 (4-7.5)         | 0.5     |
| <b>PUD - no. (%)</b>                                            | 1 (2)              | 0 (0)             | 1       |
| <b>Diabetes - no. (%)</b>                                       | 16 (27)            | 4 (31)            | 0.75    |
| <b>CVS dx - no. (%)</b>                                         | 23 (38)            | 6 (46)            | 0.76    |
| <b>Anemia - no. (%)</b>                                         | 11 (18)            | 3 (27)            | 0.7     |
| <b>Malignancy - no. (%)</b>                                     | 14 (23)            | 5 (39)            | 0.3     |
| <b>IBD - no. (%)</b>                                            | 5 (8)              | 1 (8)             | 1       |
| <b>Renal Failure - no. (%)</b>                                  | 13 (22)            | 3 (23)            | 1       |
| <b>Dialysis - no. (%)</b>                                       | 4 (7)              | 1 (8)             | 1       |
| <b>Neutropenia - no. (%)</b>                                    | 2 (3)              | 0 (0)             | 1       |
| <b>Antibiotic Usage - no. (%)</b>                               | 46 (77)            | 10 (77)           | 1       |
| <b>Steroid Usage - no. (%)</b>                                  | 11 (18)            | 4 (30)            | 0.45    |
| <b>PPI Usage - no. (%)</b>                                      | 37 (62)            | 10 (77)           | 0.36    |
| <b>Chemotherapy - no. (%)</b>                                   | 3 (5)              | 5 (38)            | 0.004   |
| <b>Leukocyte count (x10<sup>3</sup> cells/L) - median (IQR)</b> | 12.5 (9.3-19.7)    | 16.9 (14.9-23.2)  | 0.06    |
| <b>Deterioration in Creatinine from baseline - median (IQR)</b> | 1                  | 1 (1-1.2)         | 0.95    |
| <b>Serum albumin (gr/L) - mean ± SD</b>                         | 3.1 ± 5.8          | 2.8 ± 5.9         | 0.08    |
| <b>Fecal toxin level (ng/ml) - median (IQR)</b>                 | 182 (69.7 - 672)   | 2676 (201 - 5202) | 0.008   |

Abbreviations: SD - standard deviation, PUD - peptic ulcer disease, CVS - cardiovascular, IBD - inflammatory bowel disease, PPI - peptic ulcer disease, IQR - inter-quartile range
