# Supplementary material
Source: PubMed Central journal article supplement (PMC6068787)
Supplement: Supplementary_Table_2.pdf [file Supplementary_Table_2.pdf]

**Supplementary Table 2**

| <b>Antibiotic regimen</b>                                                                                                                                                                    | <b>Severe</b> | <b>Mild/moderate</b> | <b>P - value</b> |
|----------------------------------------------------------------------------------------------------------------------------------------------------------------------------------------------|---------------|----------------------|------------------|
| <b>Metronidazole (%)</b>                                                                                                                                                                     | 11 (35)       | 20 (53)              | 0.15             |
| <b>Vancomycin (%)</b>                                                                                                                                                                        | 12 (39)       | 9 (24)               | 0.41             |
| <b>Combination (%)</b>                                                                                                                                                                       | 8 (26)        | 5 (13)               | 0.36             |
| <b>No Therapy (%)</b>                                                                                                                                                                        | 0 (0)         | 4 (10)               | 0.12             |
| Abbreviation: CDI - <i>Clostridium difficile</i> infection                                                                                                                                   |               |                      |                  |
| <b>Supplementary table 2:</b> Detailing the maximal antibiotics prescribed in the patient cohorts according to CDI severity as defined by leukocyte count. Data were missing for 4 patients. |               |                      |                  |
